# Supplementary material for: Impact of Heavy Metals on Cold Acclimation of Salix viminalis Roots
Source: MDPI journal article supplement (doi:10.3390/ijms25031545), 2024-01-26

negative regulation of cellular amide metabolic process

negative regulation of translation

proteasomal ubiquitin-independent protein catabolic process

phytosteroid metabolic process

steroid hormone biosynthetic process

sterol biosynthetic process

brassinosteroid metabolic process

phytosteroid biosynthetic process

brassinosteroid biosynthetic process

p.adjust

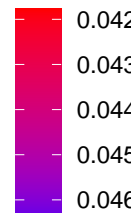

size

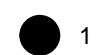

Supplement: s1 [file s1]
