# Supplementary figures and images for: Impact of Heavy Metals on Cold Acclimation of Salix viminalis Roots
Source: MDPI journal article supplement (doi:10.3390/ijms25031545), 2024-01-26

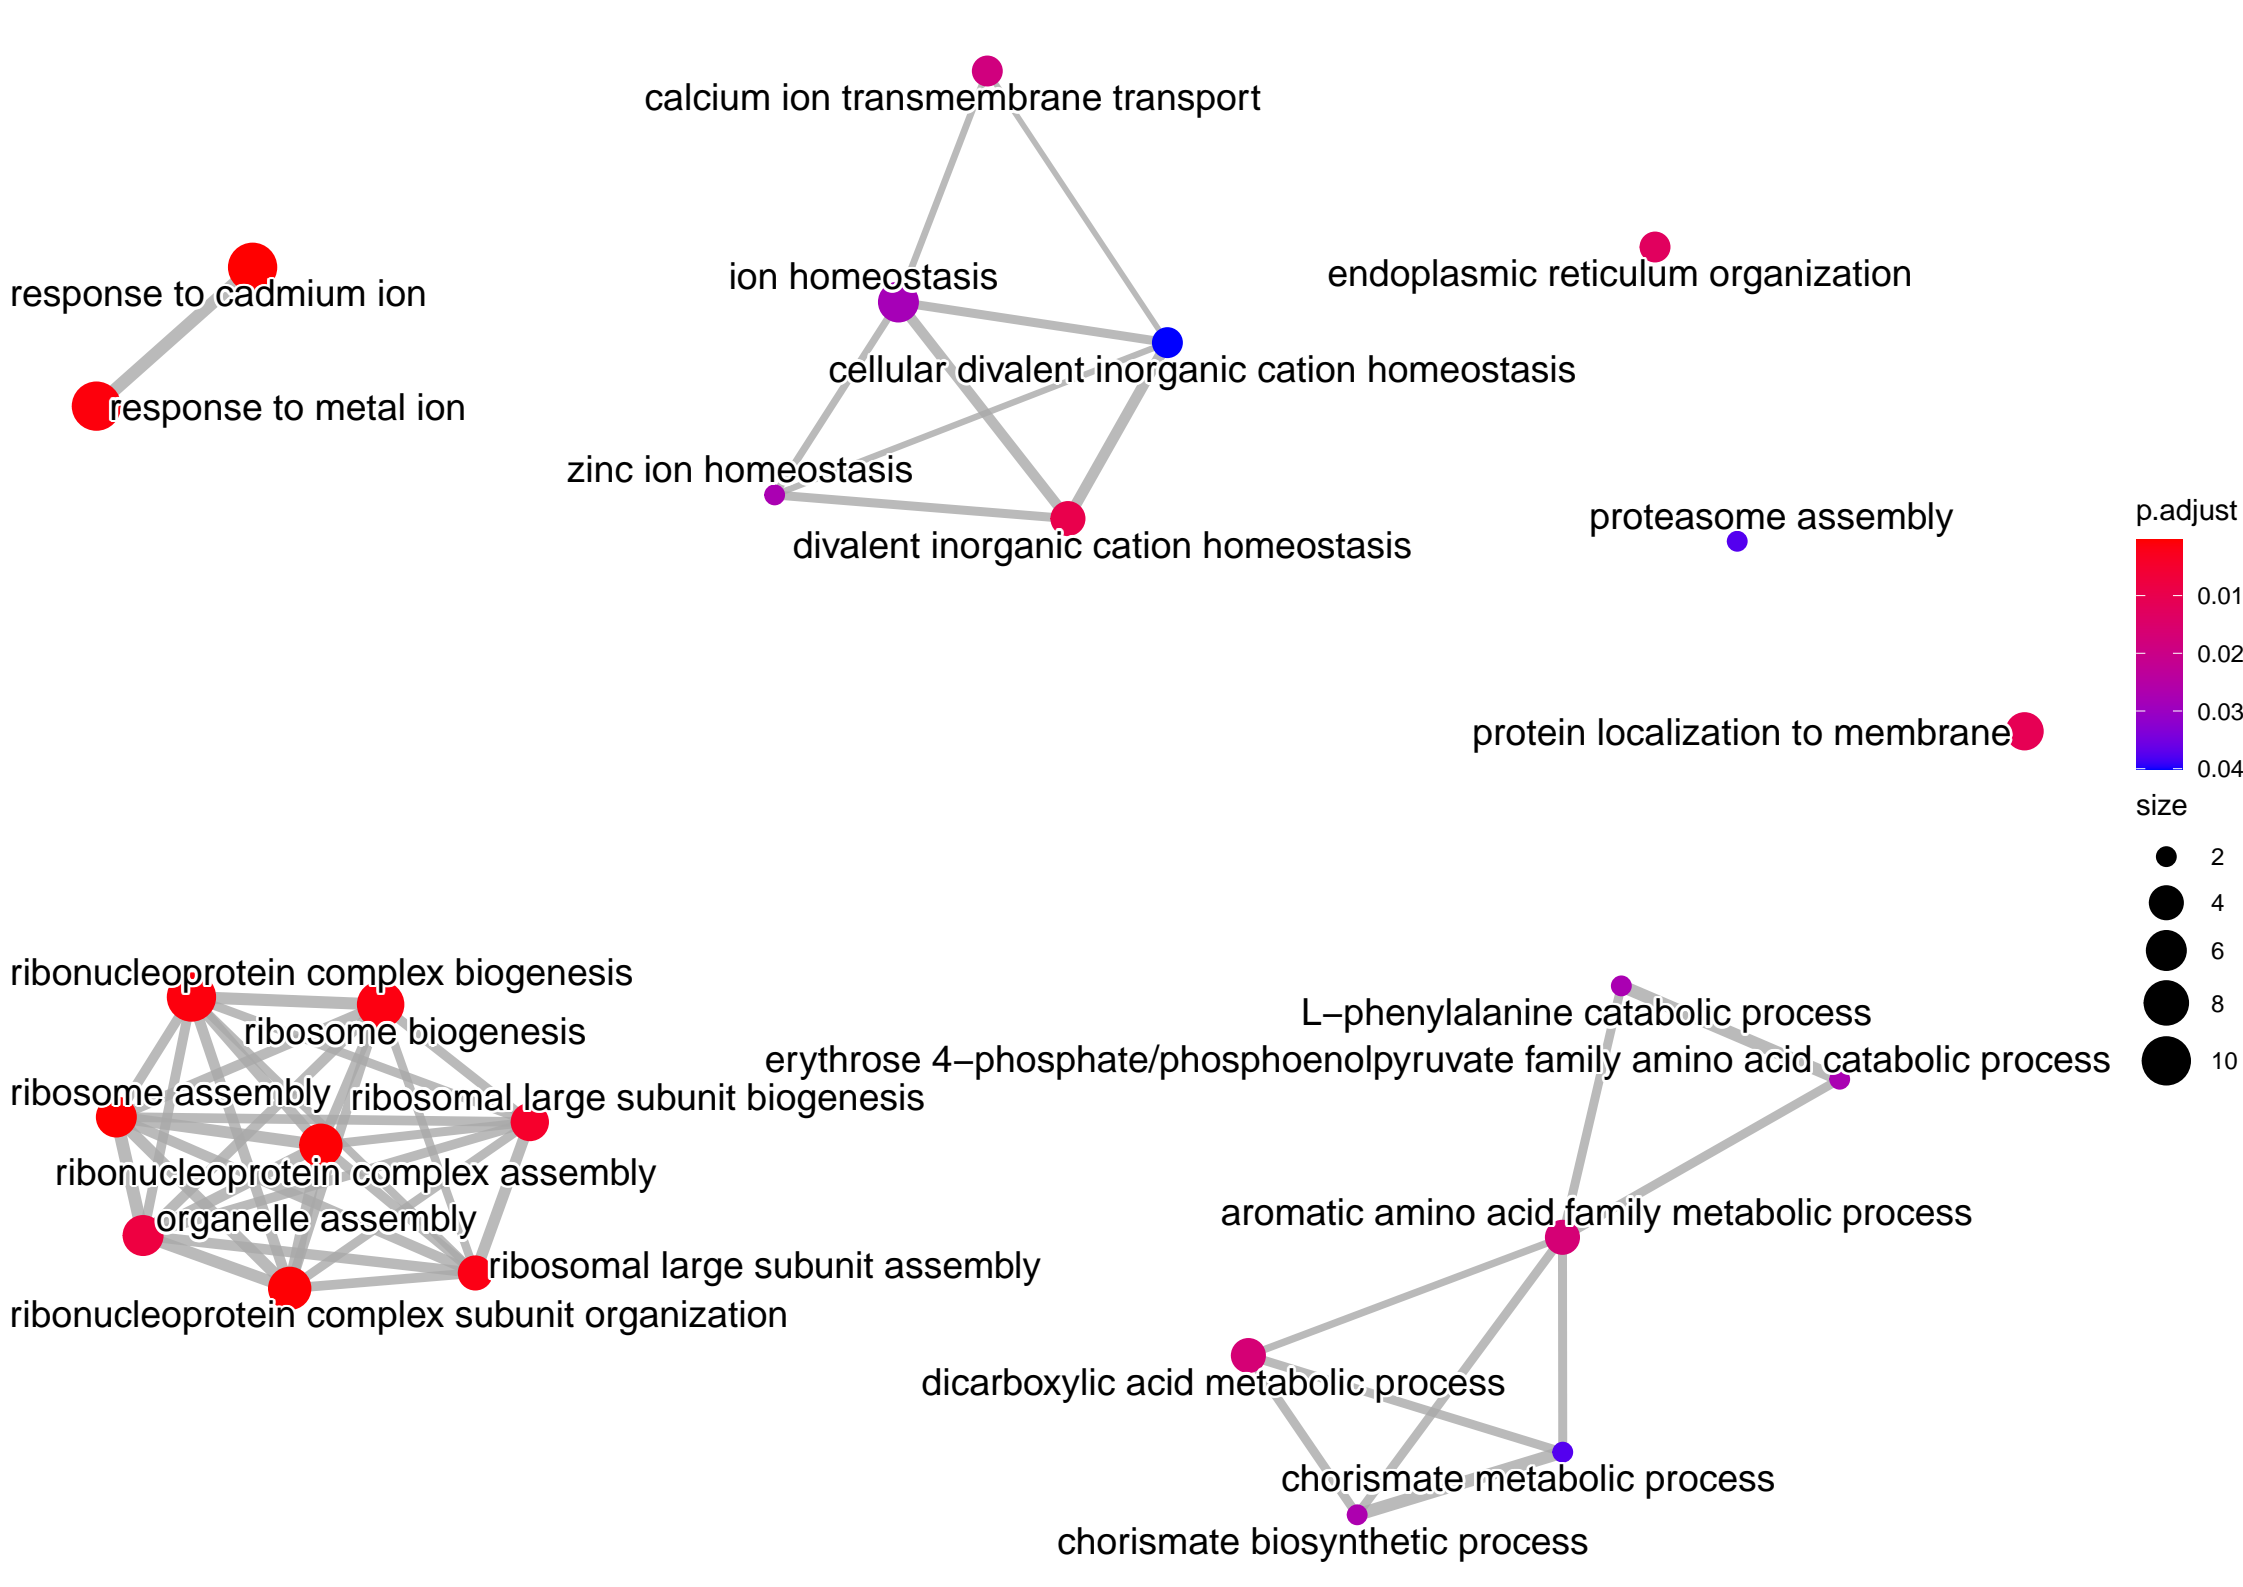

Supplement: s1 [file s1]

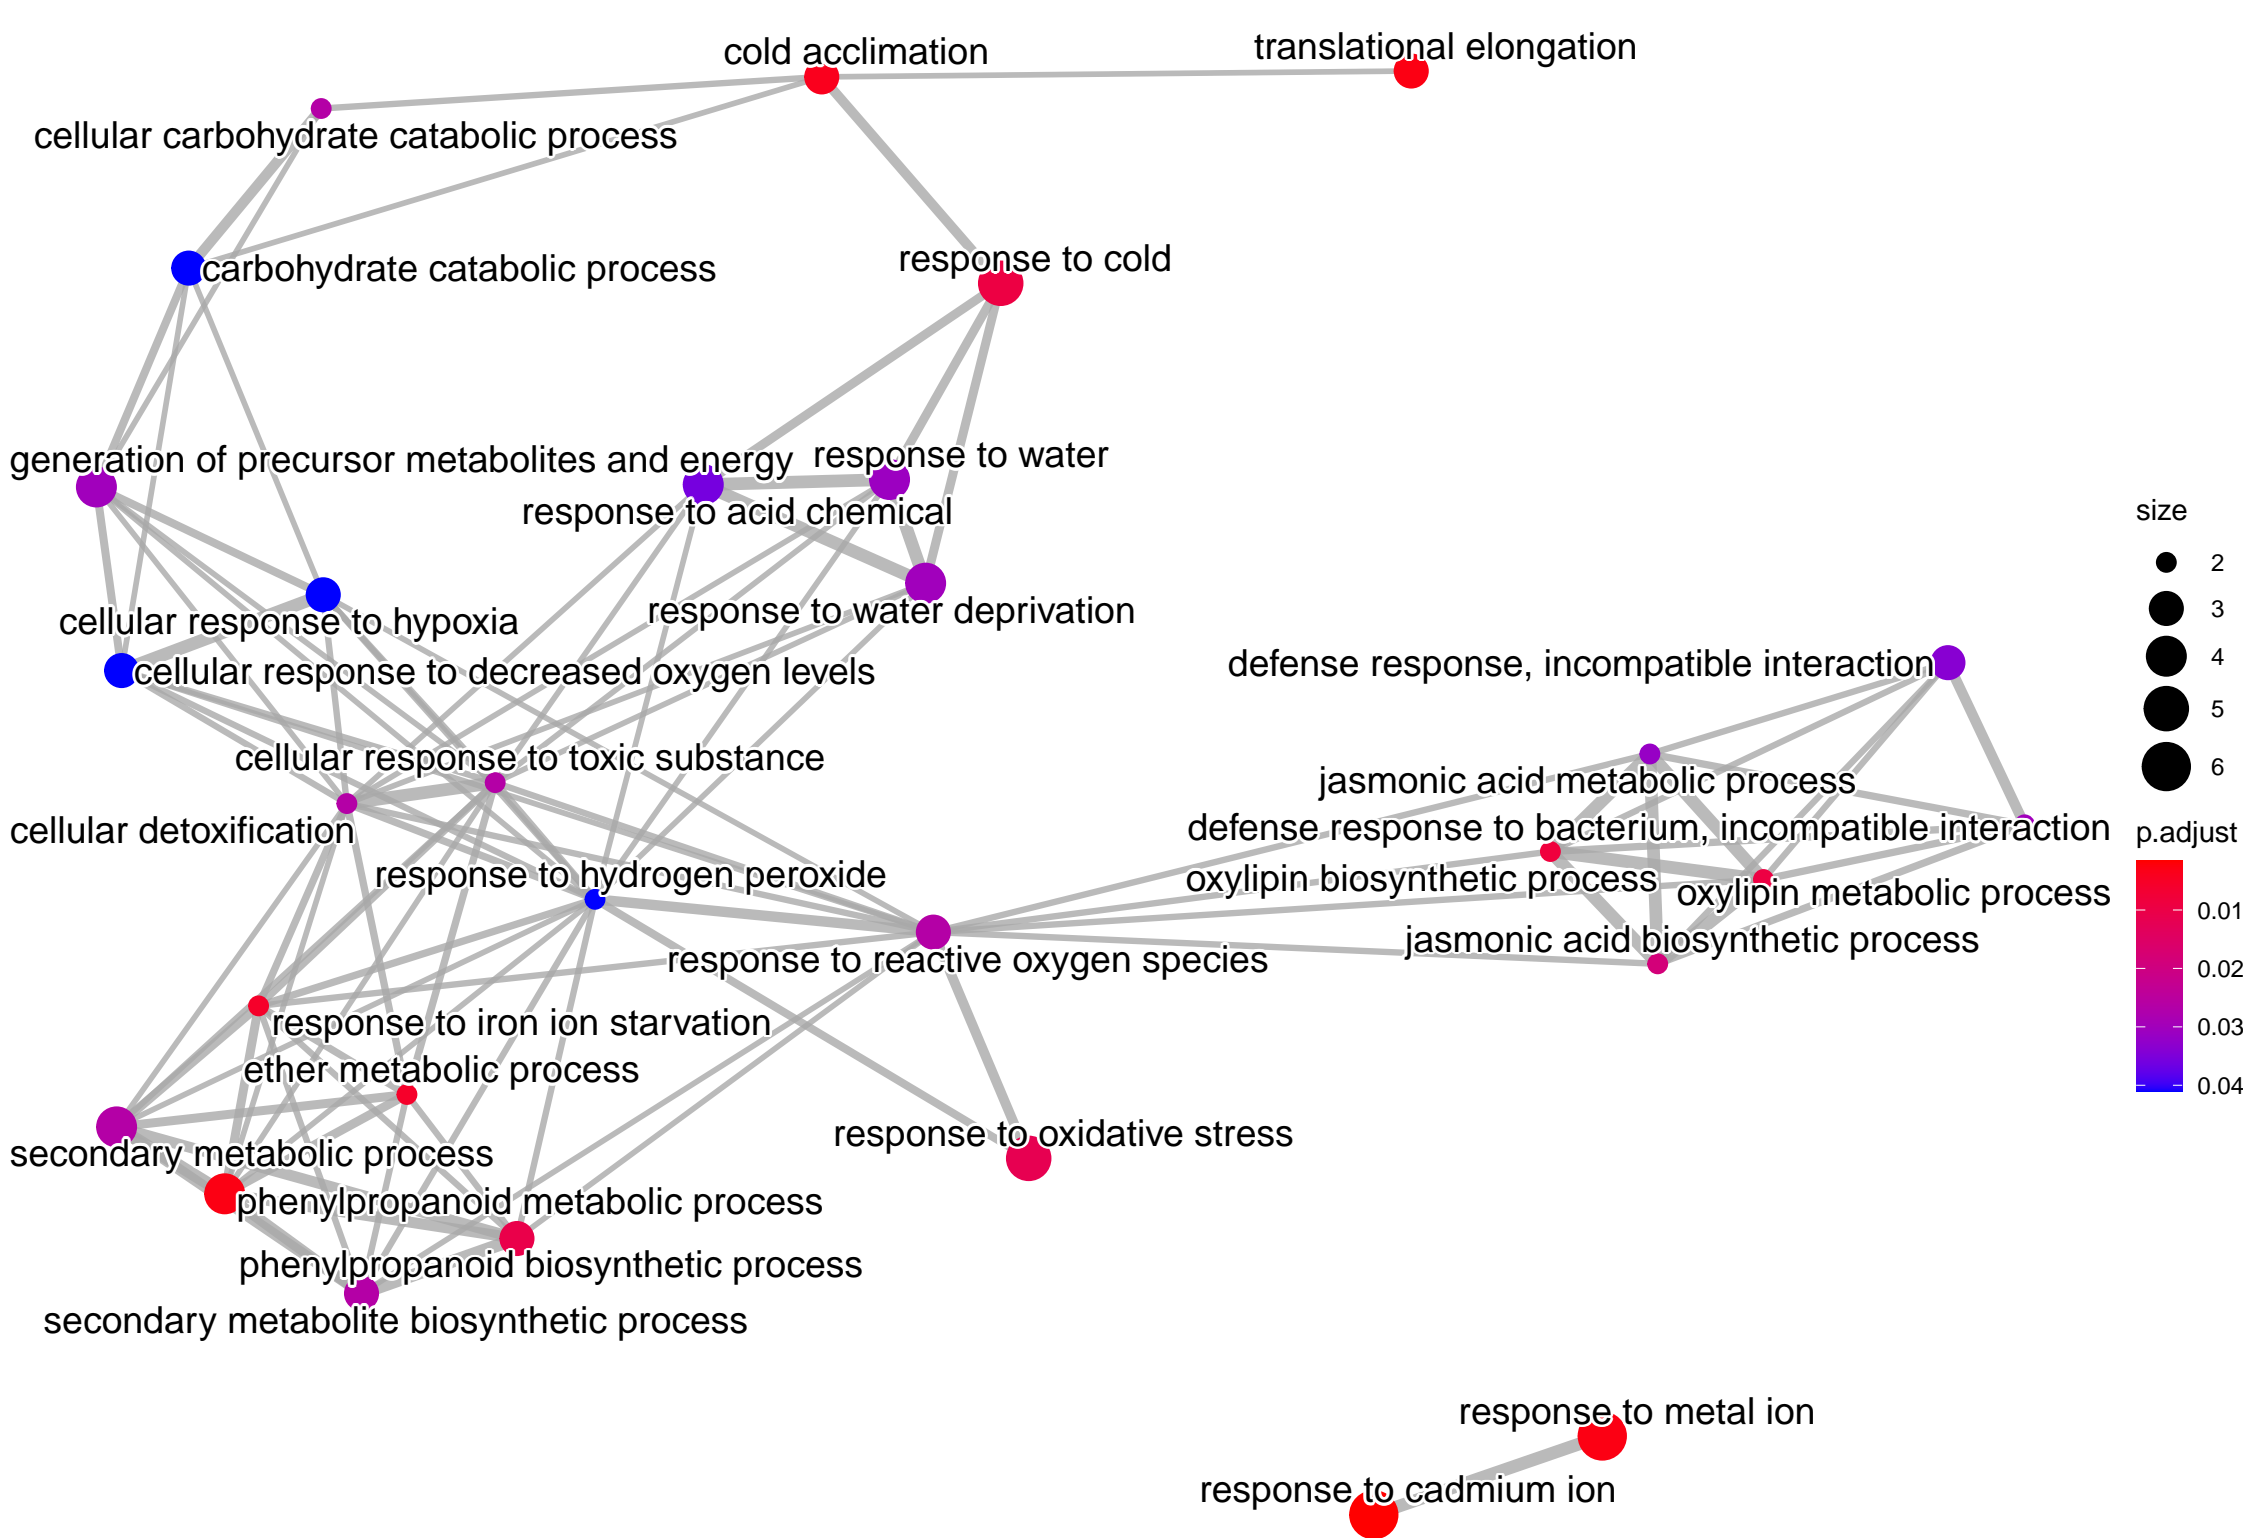

Supplement: s1 [file s1]

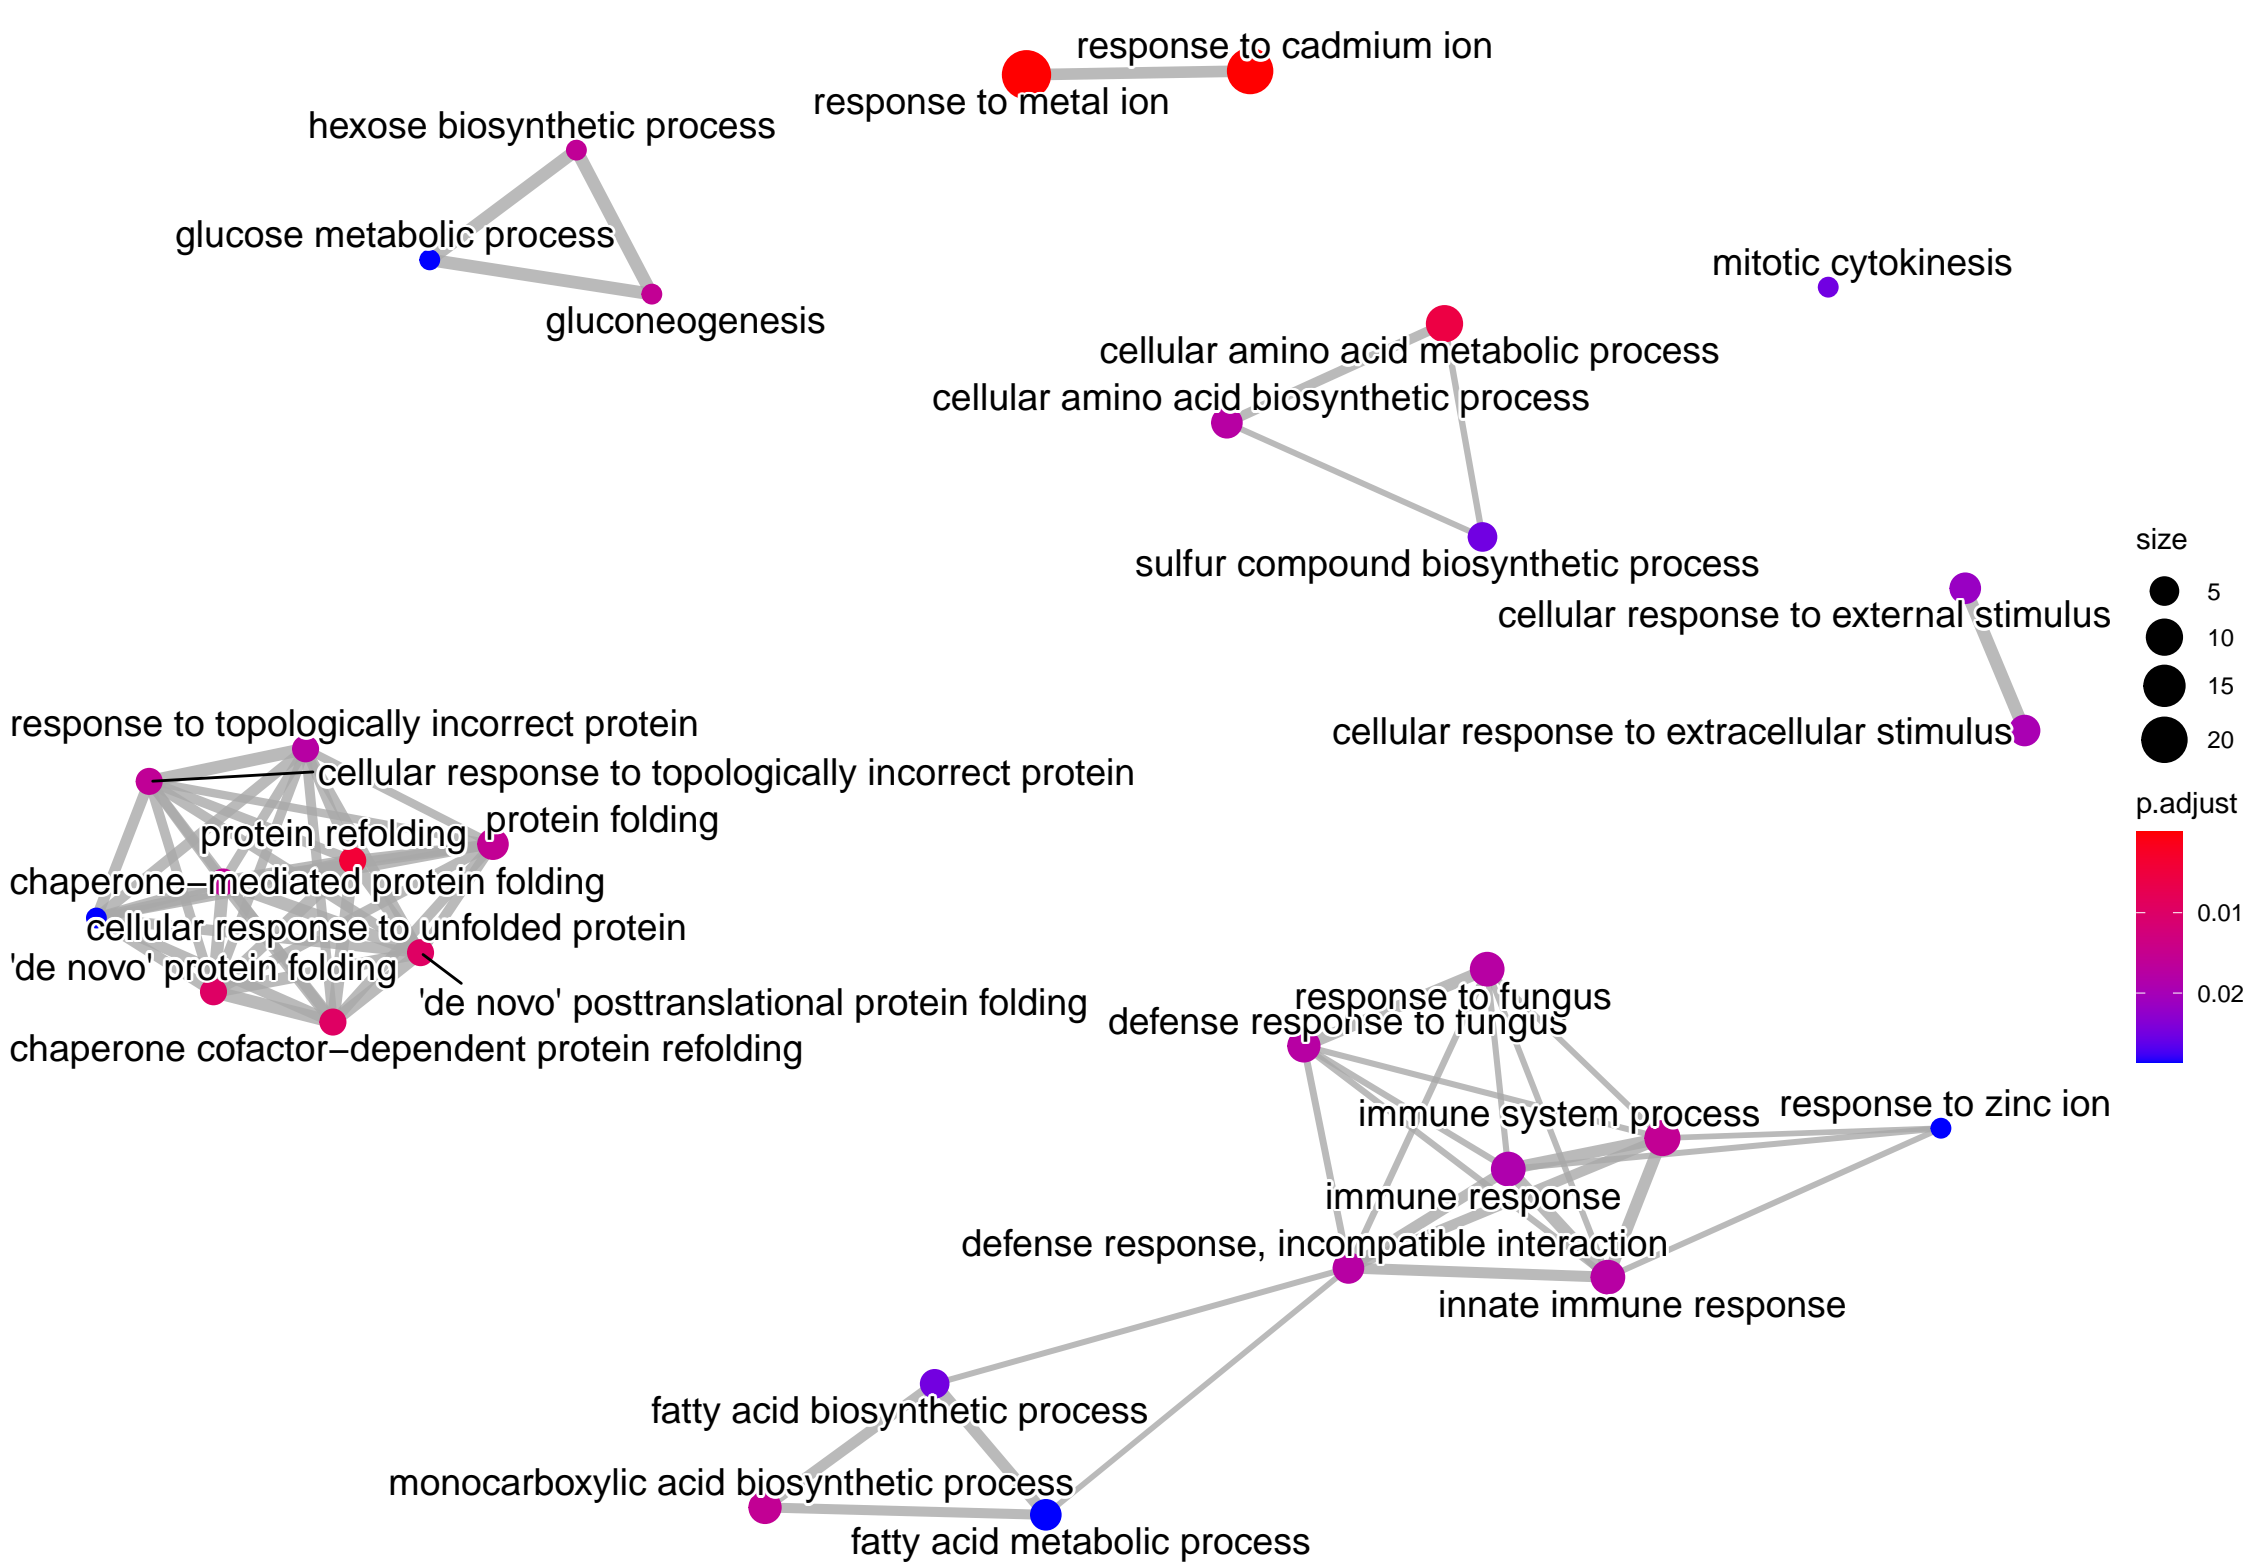

Supplement: s1 [file s1]

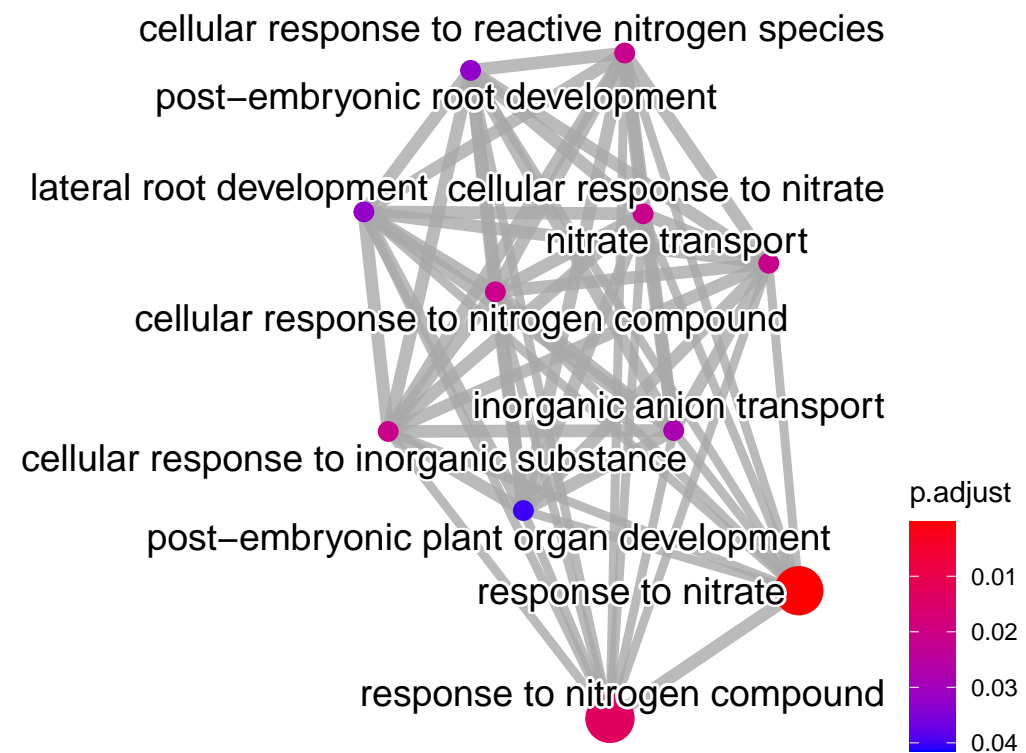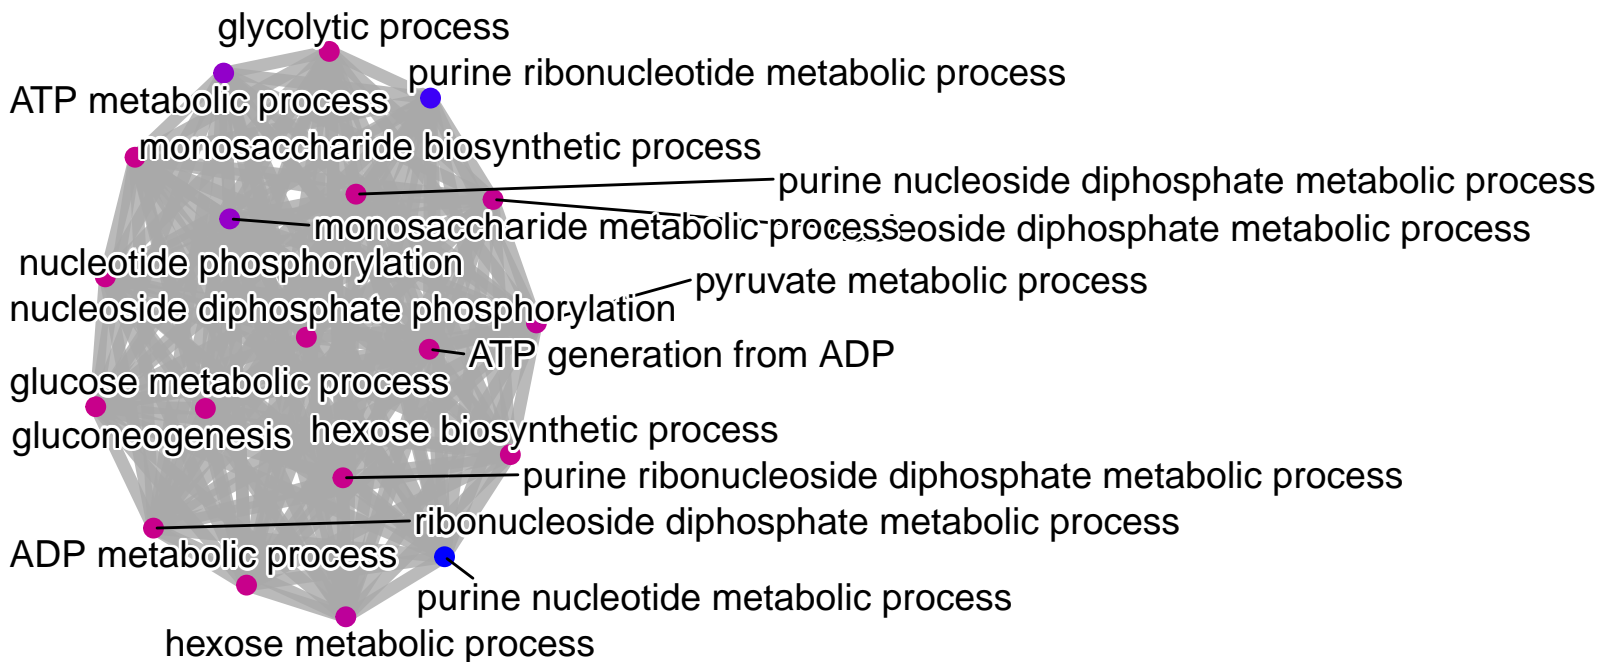

Supplement: s1 [file s1]

nucleobase-containing small molecule metabolic process

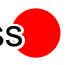

size

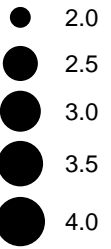

p.adjust

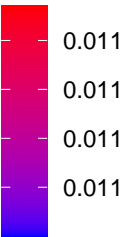

● response to insect

Supplement: s1 [file s1]

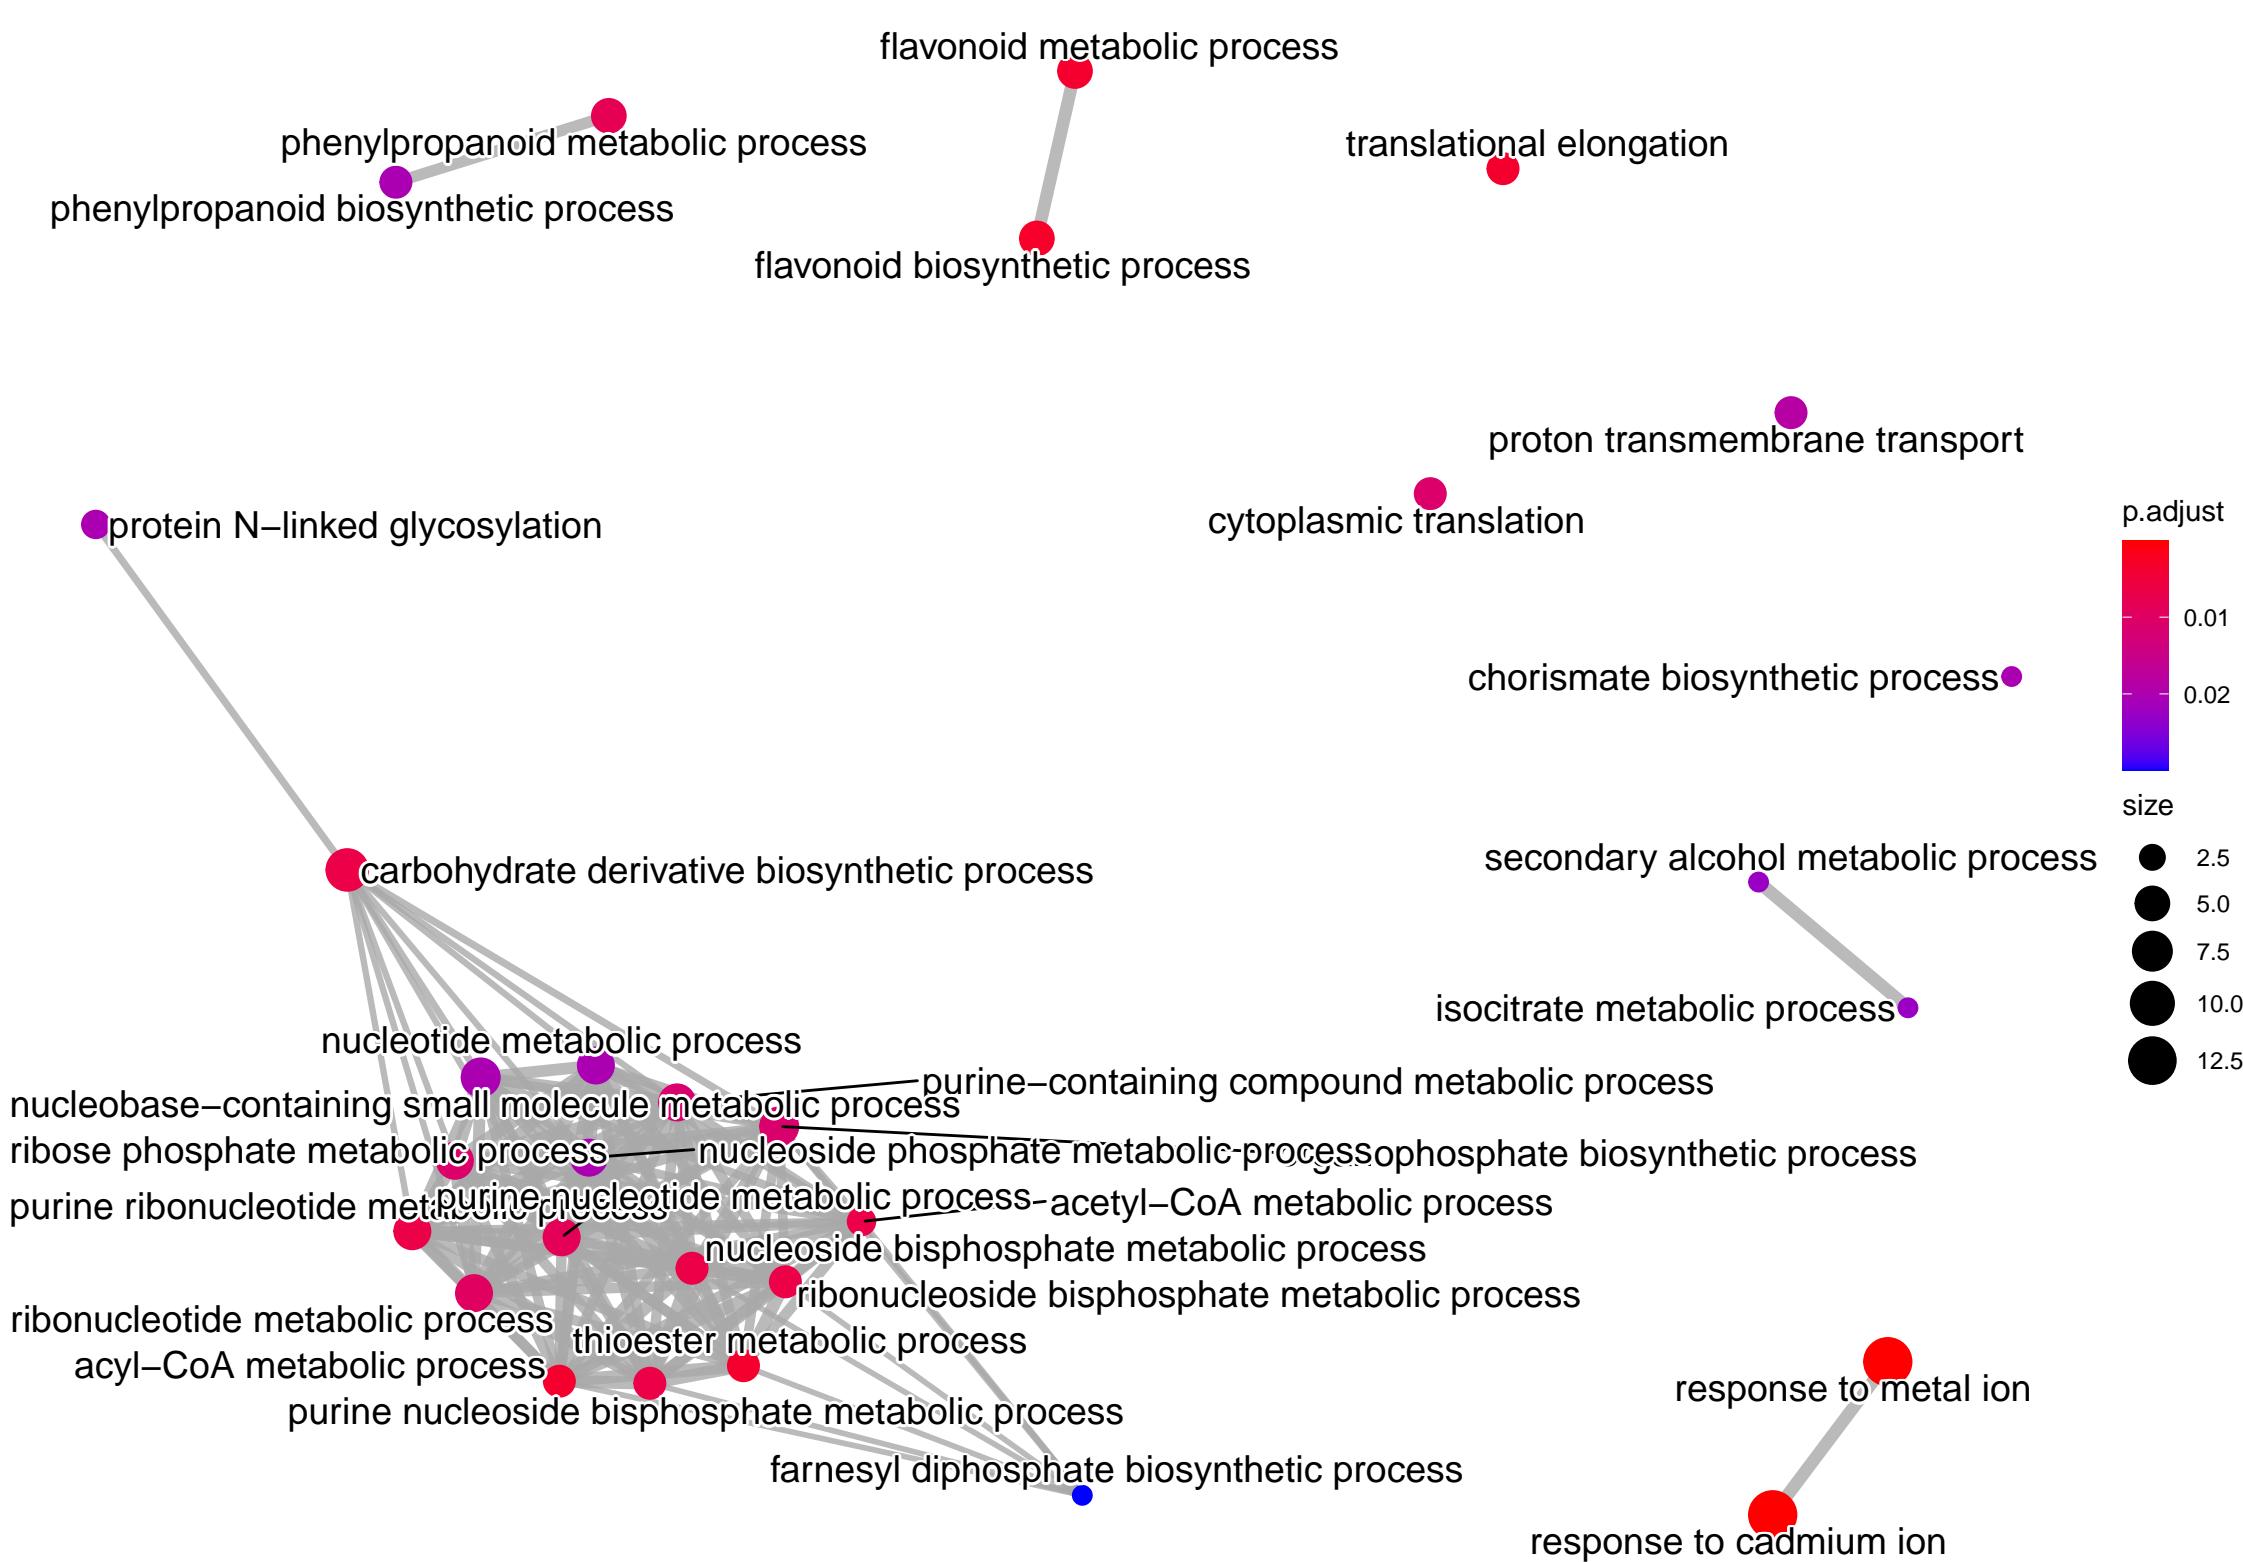

Supplement: s1 [file s1]
